# Supplementary material for: High hemoglobin levels are associated with decreased risk of diabetic retinopathy in Korean type 2 diabetes
Source: PubMed Central journal article supplement (PMC5882879; doi:10.1038/s41598-018-23905-2), 2018-04-03
Supplement: 41598_2018_23905_MOESM1_ESM.pdf [file 41598_2018_23905_MOESM1_ESM.pdf]

**High haemoglobin levels are associated with decreased risk of diabetic retinopathy in Korean patients with type 2 diabetes**

Min-Kyung Lee<sup>1</sup>, Kyung-Do Han<sup>2</sup>, Jae-Hyuk Lee<sup>1</sup>, Seo-Young Sohn<sup>1</sup>, Jee-Sun Jeong<sup>3</sup>, Mee-Kyoung Kim<sup>3</sup>, Ki-Hyun Baek<sup>3</sup>, Ki-Ho Song<sup>3</sup>, Hyuk-Sang Kwon<sup>3\*</sup>

<sup>1</sup>Division of Endocrinology and Metabolism, Department of Internal Medicine, Seonam University College of Medicine, Myongji hospital, Gyeonggi-do, Republic of Korea

<sup>2</sup>Department of Medical Statistics, College of Medicine, The Catholic University of Korea, Seoul, Republic of Korea

<sup>3</sup>Division of Endocrinology and Metabolism, Department of Internal Medicine, Yeouido St. Mary's Hospital, College of Medicine, The Catholic University of Korea, Seoul, Republic of Korea

**\*Corresponding Author:** Hyuk-Sang Kwon

Division of Endocrinology and Metabolism, Department of Internal Medicine, Yeouido St. Mary's Hospital, College of Medicine, The Catholic University of Korea, 10, 63-ro, Yeongdeungpo-gu, Seoul, 07345, Republic of Korea

Tel: +82-2-3779-1039, Fax: +82-2-785-5655, E-mail: drkwon@catholic.ac.kr

|                    | %(SE)     | OR(95% CI)*        |
|--------------------|-----------|--------------------|
| D1                 | 32.6(4.1) | 1 (ref.)           |
| D2                 | 18.8(3.5) | 0.583(0.304,1.118) |
| D3                 | 17.9(3)   | 0.435(0.23,0.82)   |
| D4                 | 16.6(2.9) | 0.543(0.282,1.045) |
| D5                 | 16.1(3)   | 0.604(0.319,1.145) |
| D6                 | 19(3.5)   | 0.622(0.335,1.156) |
| D7                 | 19.4(3.3) | 0.633(0.325,1.235) |
| D8                 | 14.4(3)   | 0.441(0.213,0.914) |
| D9                 | 9.5(2.7)  | 0.242(0.099,0.592) |
| D10                | 14.3(2.7) | 0.389(0.179,0.847) |
| <i>P</i> for trend | <0.0001   | <0.0001            |

**Supplementary Table S1. The risk of diabetic retinopathy by deciles of haemoglobin levels**

\*Full model adjusted
